# Supplementary material for: Environmental and Economic Assessment of a Novel Solvolysis-Based Biorefinery Producing Lignin-Derived Marine Biofuel and Cellulosic Ethanol
Source: MDPI journal article supplement (doi:10.3390/en15145007), 2022-07-08
Supplement: s1 [file s1]

Archive with 1 entries (1 files):
- energies-1783176-supplementary.pdf
